# Supplementary material for: Cold Weather Conditions and Risk of Hypothermia Among People Experiencing Homelessness: Implications for Prevention Strategies
Source: MDPI journal article supplement (doi:10.3390/ijerph16183259), 2019-09-05
Supplement: s1 [file s1]

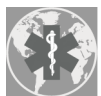

# Supplementary Materials: Cold Weather Conditions and Risk of Hypothermia Among People Experiencing Homelessness: Implications for Prevention Strategies

**Table S1.** Odds ratios for the association between a 5 °C drop in the mean hourly wind chill and hypothermic injury or death ( $n = 97$  events) <sup>a</sup>.

| Meteorological Variables                   | Unadjusted Odds Ratio<br>(95% CI) | Adjusted Odds Ratio<br>(95% CI) <sup>b, c</sup> |
|--------------------------------------------|-----------------------------------|-------------------------------------------------|
| Minimum Temperature<br>(per 5 °C decrease) | 1.41 (1.19–1.66)                  | 1.49 (1.25–1.77)                                |
| Precipitation (mm) <sup>c</sup>            | 1.07 (1.01–1.13)                  | 1.10 (1.03–1.17)                                |

<sup>a</sup>: Conditional logistic regression models; <sup>b</sup>: Adjusted models include the mean hourly wind chill and precipitation; <sup>c</sup>: Models with precipitation have 96 events due to missing data at one event date.
